# Supplementary material for: A silicone-based stretchable micropost array membrane for monitoring live-cell subcellular cytoskeletal response
Source: Royal Society of Chemistry journal article supplement (doi:10.1039/c2lc20896b), 2011-12-23

## SUPPLEMENTARY MATERIALS

### **A Silicone-Based Stretchable Micropost Array Membrane for Monitoring Live-Cell Subcellular Cytoskeletal Response**

Jennifer M. Mann<sup>1,2,\$</sup>, Raymond H. W. Lam<sup>1,2,#,\$</sup>, Shinuo Weng<sup>1,2</sup>,  
Yubing Sun<sup>1,2</sup>, and Jianping Fu<sup>1,2,3,\*</sup>

<sup>1</sup>Integrated Biosystems and Biomechanics Laboratory, University of Michigan, Ann Arbor, MI 48105, USA; <sup>2</sup>Department of Mechanical Engineering, University of Michigan, Ann Arbor, MI 48105, USA; <sup>3</sup>Department of Biomedical Engineering, University of Michigan, Ann Arbor, MI 48105, USA; <sup>#</sup>Current address: Department of Mechanical and Biomedical Engineering, City University of Hong Kong, Hong Kong; <sup>\$</sup>These authors contributed equally to this work.

\*Correspondence should be addressed to J. Fu [J. Fu (email address: jpfu@umich.edu, Tel: 01-734-615-7363, Fax: 01-734-647-7303)].

## FIGURE CAPTIONS

**Figure S1.** Evolution of the absolute, non-normalized total cellular contractility for individual VSMCs (*gray* lines) and population means (*black* lines with marker symbols) under different stretch conditions as indicated (**a**: 6% stretch; **b**: 15% stretch). Error bars indicate  $\pm$  standard errors (SE) of the cell populations. *P*-values calculated using the paired student's *t*-test are indicated for statistically significant differences ( $P < 0.05$  (\*); *N.S.*, not significant).

**Figure S2.** Evolution of the average contractile forces exerted on individual PDMS microposts partitioned into the cell central and peripheral regions underneath the VSMC tracked throughout the whole stretch assay (top row, **a-c**: three individual VSMCs stretched at 6%; bottom row, **d-f**: three individual VSMCs stretched at 15%). *White* symbols were the population mean for the PDMS microposts at the cell periphery and *red* symbols were the population mean for the PDMS microposts at the central region of the cell. The *black* symbols corresponded to the population mean for all the PDMS microposts underneath the individual VSMCs.

**Figure S3.** Evolution of contractile forces exerted on individual PDMS microposts underneath the VSMC tracked throughout the whole stretch assay (top row, **a-c**: three individual VSMCs stretched at 6%; bottom row, **d-f**: three individual VSMCs stretched at 15%). *Blue* curves were from the PDMS microposts at the cell periphery and *gold* curves were from the PDMS microposts at the central region of the cell. The bold *black* curve corresponded to the population mean for the PDMS micropost in the cell periphery region and the bold *red* line corresponded to the population mean for the cell central region. In **d-f**, the numerical data in the plots indicates the maximum values that the outlier curves reached outside the plot window.

## FIGURES

### Figure S1

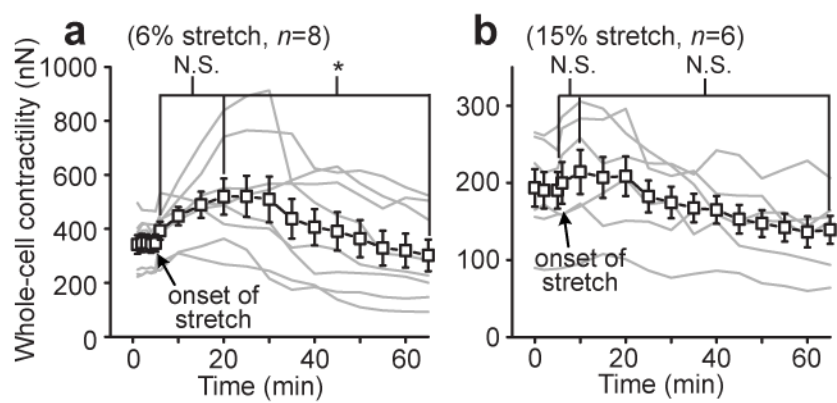

Figure S2

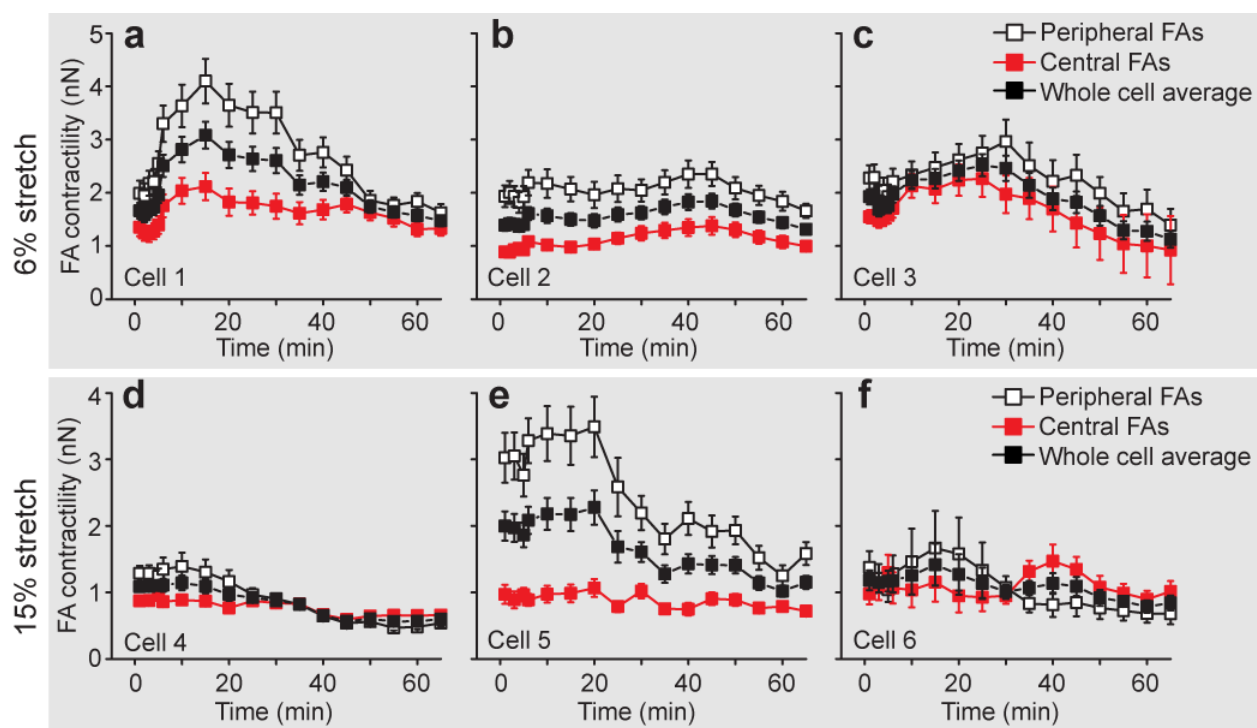

Figure S3

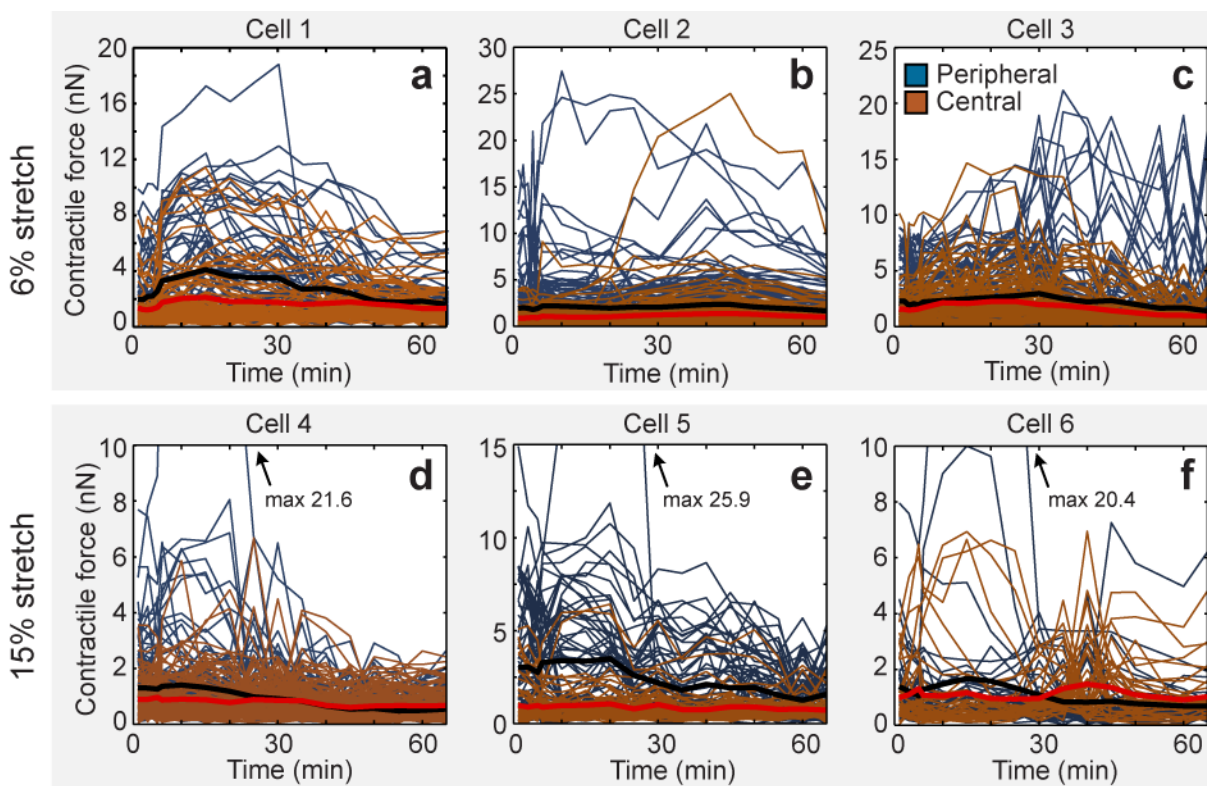

Supplement: c2lc20896b.pdf [file c2lc20896b.pdf]
